# Supplementary material for: Role of tryptophan 135 of Chandipura virus phosphoprotein P in dimerization and complex formation with leader RNA: structural aspect using time resolved anisotropy and simulation
Source: Royal Society of Chemistry journal article supplement (doi:10.1039/c5ra20863g), 2015-01-01
Supplement: c5ra20863g1.pdf [file c5ra20863g1.pdf]

**Supporting Information Section:**

**Role of Tryptophan 135 of Chandipura Virus Phosphoprotein P in Dimerization and Complex Formation with Leader RNA: Structural Aspect using Time Resolved Anisotropy and Simulation**

**Manini Mukherjee<sup>a</sup>, Aditya Sarkar<sup>b</sup>, Arunava Roy<sup>c</sup>, Pinki Saha Sardar<sup>a</sup>, Ansuman Lahiri<sup>b\*</sup>, Dhruvajyoti Chattopadhyay<sup>c\*</sup> and Sanjib Ghosh<sup>a\*</sup>**

*<sup>a</sup>Department of Chemistry, Presidency University, Kolkata 700 073, India.*

*<sup>b</sup>Department of Bio-Physics, Molecular Biology and Bioinformatics, University of Calcutta, Kolkata - 700 009, India.*

*<sup>c</sup>Dr. B. C. Guha Centre for Generic Engineering and Biotechnology, Department of Biotechnology, University of Calcutta, Kolkata 700019, India.*

**\*Author for correspondence:**

*Tel.: +91-9836940620 (S.G.), +9133-2241 3893 (S.G.); Fax: +9133-2241 3893 (S.G.);*

*E-mail: [sanjibg@cal2.vsnl.net.in](mailto:sanjibg@cal2.vsnl.net.in) (S.G.); [pchemsg@gmail.com](mailto:pchemsg@gmail.com) (S.G.)*

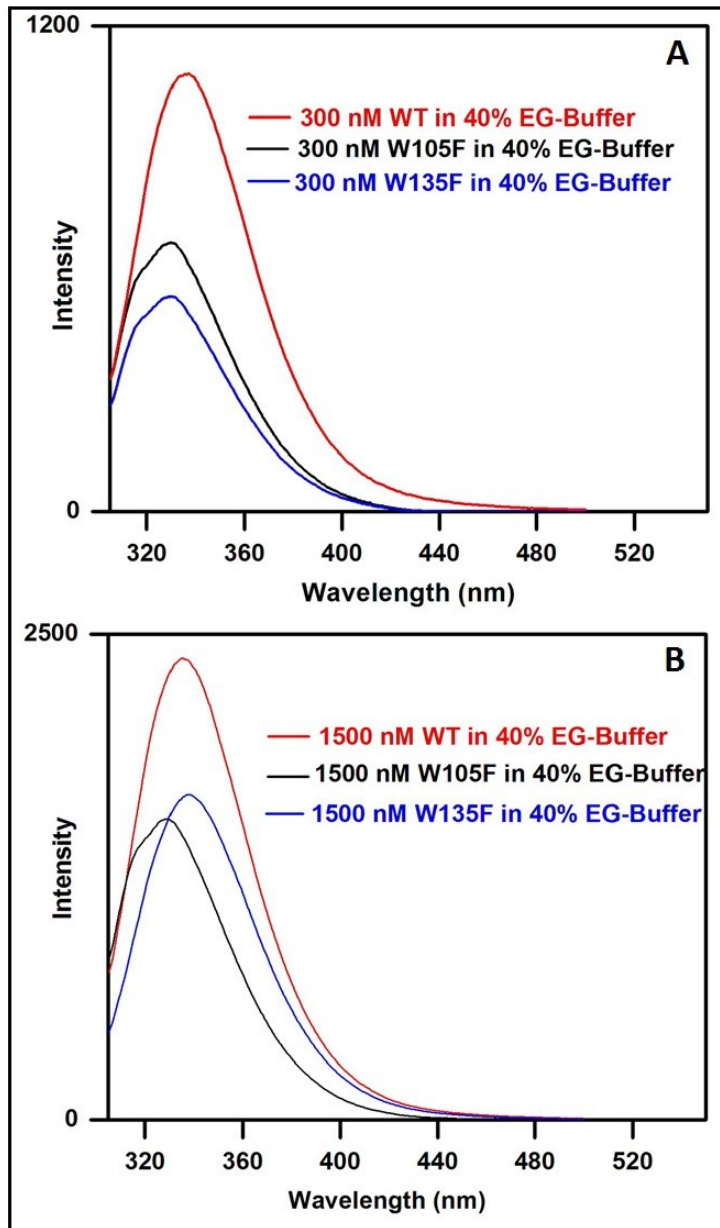

Figure S1: Steady state fluorescence spectra at 298 K of WT CHPV and the mutants W135F and W105F in 40% EG- buffer at (A) 300 nM concentration and (B) 1500 nM concentration.  $\lambda_{\text{exc}} = 295$  nm, Excitation and emission bandpass = 10 nm and 5 nm each.
